# Supplementary material for: A Food-Derived Flavonoid Luteolin Protects against Angiotensin II-Induced Cardiac Remodeling
Source: PubMed Central journal article supplement (PMC4556625; doi:10.1371/journal.pone.0137106), 2015-09-01
Supplement: pone.0137106.s004.pdf [file pone.0137106.s004.pdf]

**S1 Table. Primer sequences used for quantitative RT-PCR**

| Gene                               | Forward primer (5'-3') | Reverse primer (5'-3')      |
|------------------------------------|------------------------|-----------------------------|
| rat TGF $\beta$ 1 ( <i>Tgfb1</i> ) | ACCTGCAAGACCATCGACATG  | CGAGCCTTAGTTTGGACAGGAT      |
| rat CTGF ( <i>Ctgf</i> )           | AAGACCTGTGGGATGGGC     | TGGTGCAGCCAGAAAGCTC         |
| rat Collagen 1 ( <i>Col1a1</i> )   | CAACCTCAAGAAGTCCCTGC   | AGGTGAATCGACTGTTGCCT        |
| rat Collagen 3 ( <i>Col3a1</i> )   | CACCCCTCTCTTATTTTGGCAC | AGACTCATAGGACTGACCAAGGTAGTT |
| rat TNF $\alpha$ ( <i>Tnf</i> )    | CCCAGACCCTCACACTCAGAT  | TTGTCCCTTGAAGAGAACCTG       |
| rat MCP1 ( <i>Ccl2</i> )           | ATGCAGTTAATGCCCCACTC   | TTCCTTATTGGGGTCAGCAC        |
| rat Nox2 ( <i>Cybb</i> )           | ACTTCTTGGGTCAGCACTGG   | GTTCCCTGTCCAGTTGTCTTCG      |
| rat Nox4 ( <i>Nox4</i> )           | TAGCTGCCCACTTGGTGAACG  | TGTAACCATGAGGAACAATACCACC   |
| rat ANP ( <i>Nppa</i> )            | ATCACCAAGGGCTTCTTCCT   | TGTTGGACACCGCACTGTAT        |
| rat BNP ( <i>Nppb</i> )            | ACAATCCACGATGCAGAAGCT  | GGGCCTTGGTCCTTTGAGA         |
| rat GAPDH ( <i>Gapdh</i> )         | ATGATTCTACCCACGGCAAG   | CTGGAAGATGGTGATGGGTT        |
| rat $\beta$ -actin ( <i>Actb</i> ) | GGGAAATCGTGCGTGACATT   | GCGGCAGTGGCCATCTC           |
